# Supplementary material
Source: publisher figshare collection journal article supplement (https://acs.figshare.com/ndownloader/files/4292794)

## Supplementary Information

### Small Molecule Inhibition of the TNF Family Cytokine CD40 Ligand Through a Subunit Fracture Mechanism

Laura F. Silvian, Jessica E. Friedman, Kathy Strauch, Teresa G. Cachero, Eric Day, Fang  
Qian, Brian Cunningham, Amy Fung, Lihong Sun, Lihe Su, Zhongli Zheng,  
Gnanasambandam Kumaravel, and Adrian Whitty

#### Contents:

**Figure S1.** Synthetic scheme for preparation of BIO8898.

**Figure S2.** Examples of other compounds that have been reported to inhibit CD40L or other TNF family cytokines.

**Figure S3.** Top view of the superposition of CD40L v. CD40L/BIO8898 to highlight differences in receptor binding surfaces at the protomer interfaces.

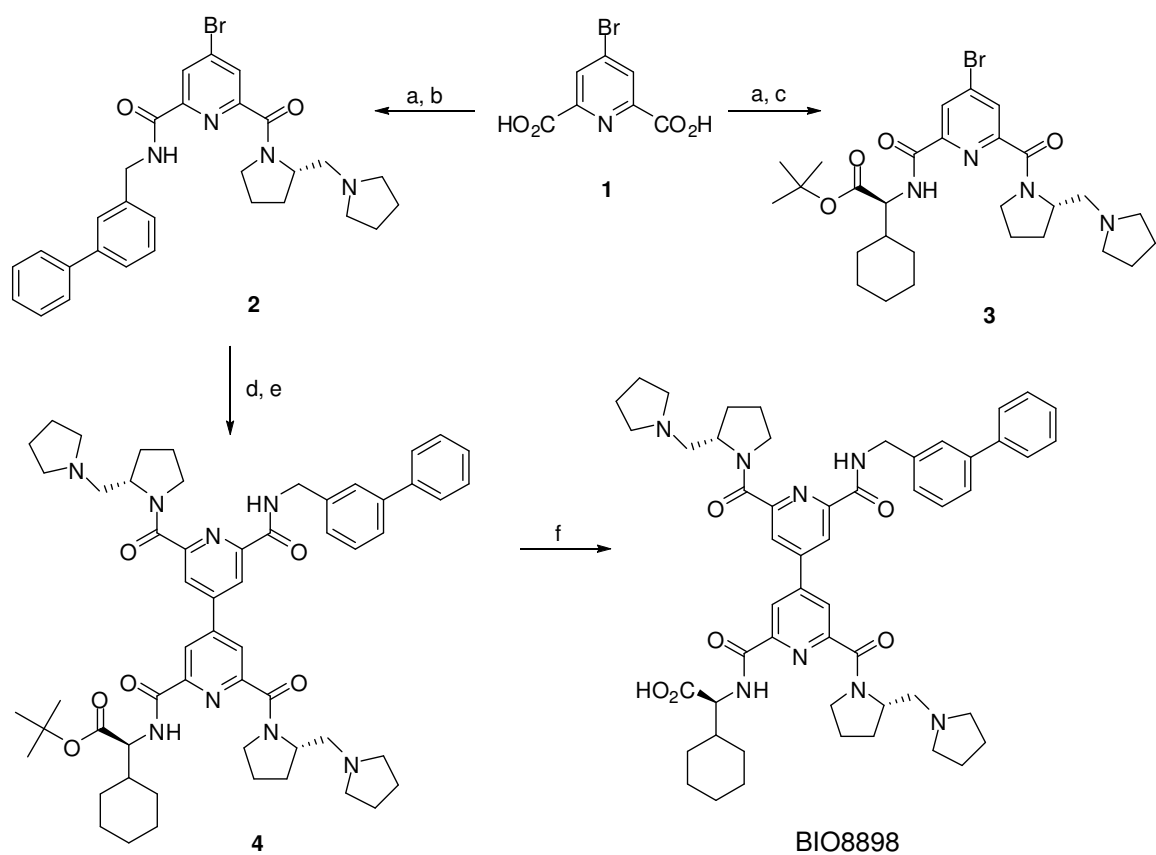

**Figure S1. Synthesis of BIO8898** (For additional details, see Materials and Methods)

(a). Oxalyl chloride; (b). Et<sub>3</sub>N, CH<sub>2</sub>Cl<sub>2</sub>, (*S*)-1,2'-methylenedipyrrolidine, biphenyl-4-ylmethanamine; (c). Et<sub>3</sub>N, CH<sub>2</sub>Cl<sub>2</sub>, (*S*)-1,2'-methylenedipyrrolidine, (*S*)-tert-butyl 2-amino-2-cyclohexylacetate (HCl salt); (d). bis(pinacolato)diboron, [1, 1'-bis(diphenylphosphino)ferrocene]dichloropalladium(II) (complex with CH<sub>2</sub>Cl<sub>2</sub>), KOAc, DMF, 80 °C; (e). aq. Na<sub>2</sub>CO<sub>3</sub>, 80 °C; (f). TFA, CH<sub>2</sub>Cl<sub>2</sub>.

**Figure S2. Examples of other compounds that have been reported to inhibit CD40L or other TNF family cytokines.** (a) Suramin<sup>1</sup> (b) DR13<sup>2</sup> (c) DR80<sup>2</sup> (d) erythrosine<sup>2,3</sup> and (e) MB1<sup>4</sup>. (For additional examples, see reference 2.)

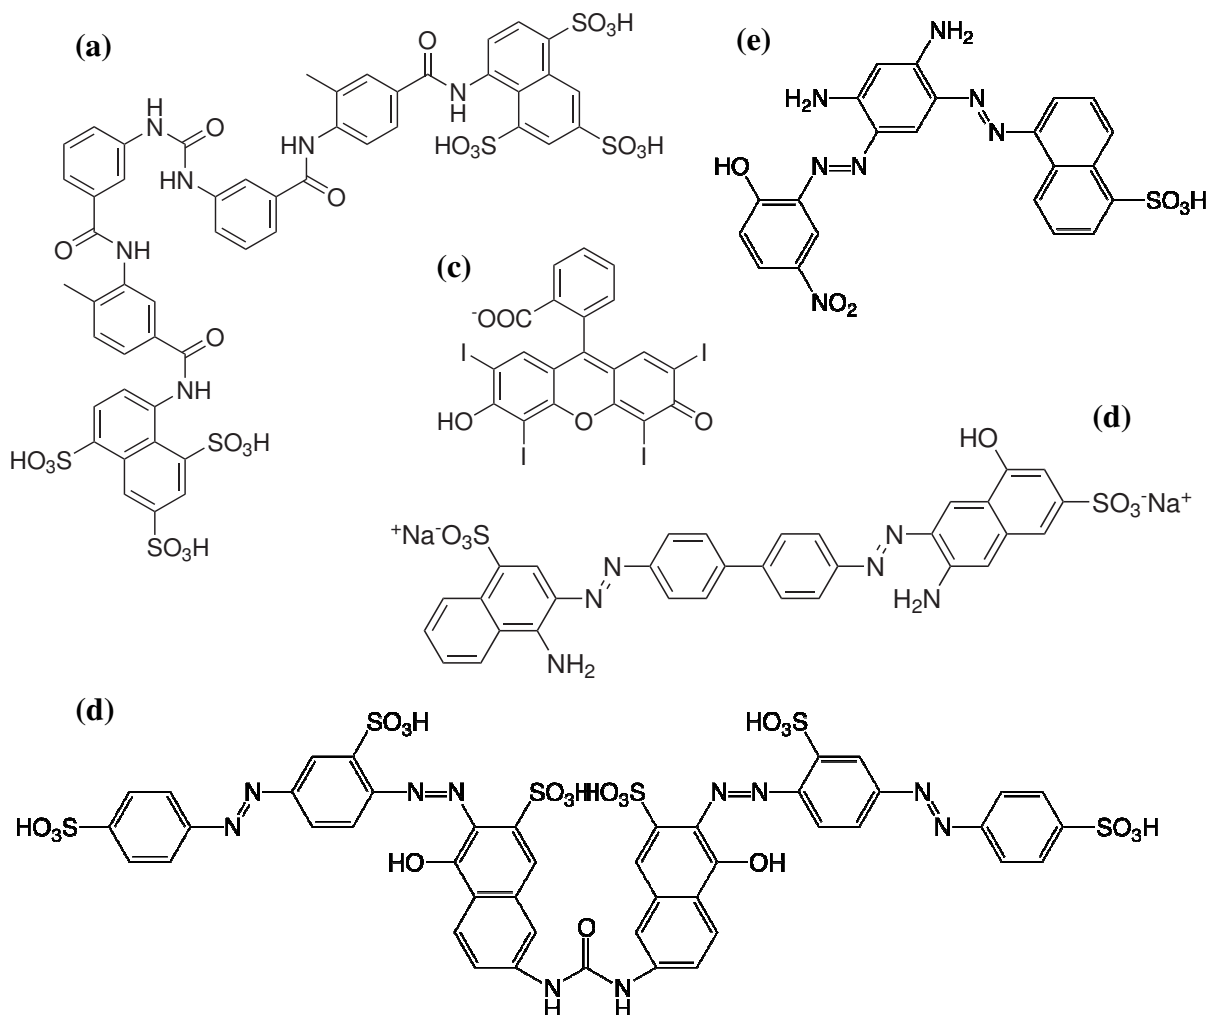

<sup>1</sup>Margolles-Clark, E., Jacques-Silva, M. C., Ganesan, L., Umland, O., Kenyon, N. S., Ricordi, C., Berggren, P. O., and Buchwald, P. (2009) Suramin inhibits the CD40-CD154 costimulatory interaction: a possible mechanism for immunosuppressive effects, *Biochem Pharmacol* 77, 1236-1245.

<sup>2</sup>Margolles-Clark, E., Umland, O., Kenyon, N. S., Ricordi, C., and Buchwald, P. (2009) Small-molecule costimulatory blockade: organic dye inhibitors of the CD40-CD154 interaction, *J Mol Med* 87, 1133-1143.

<sup>3</sup>Ganesan, L., Margolles-Clark, E., Song, Y., and Buchwald, P. (2011) The food colorant erythrosine is a promiscuous protein-protein interaction inhibitor, *Biochem Pharmacol* 81, 810-818.

<sup>4</sup>Margolles-Clark, E., Kenyon, N. S., Ricordi, C., and Buchwald, P. (2010) Effective and specific inhibition of the CD40-CD154 costimulatory interaction by a naphthalenesulphonic acid derivative, *Chem Biol Drug Des* 76, 305-313.

**Figure S3.** Top view of a superposition of subunit B of CD40L (grey ribbons) with the same subunit in the CD40L/BIO8898 complex structure (colors, according to subunit) showing how the binding of one BIO8898 per trimer distorts the structure of the protein at all three receptor binding sites.

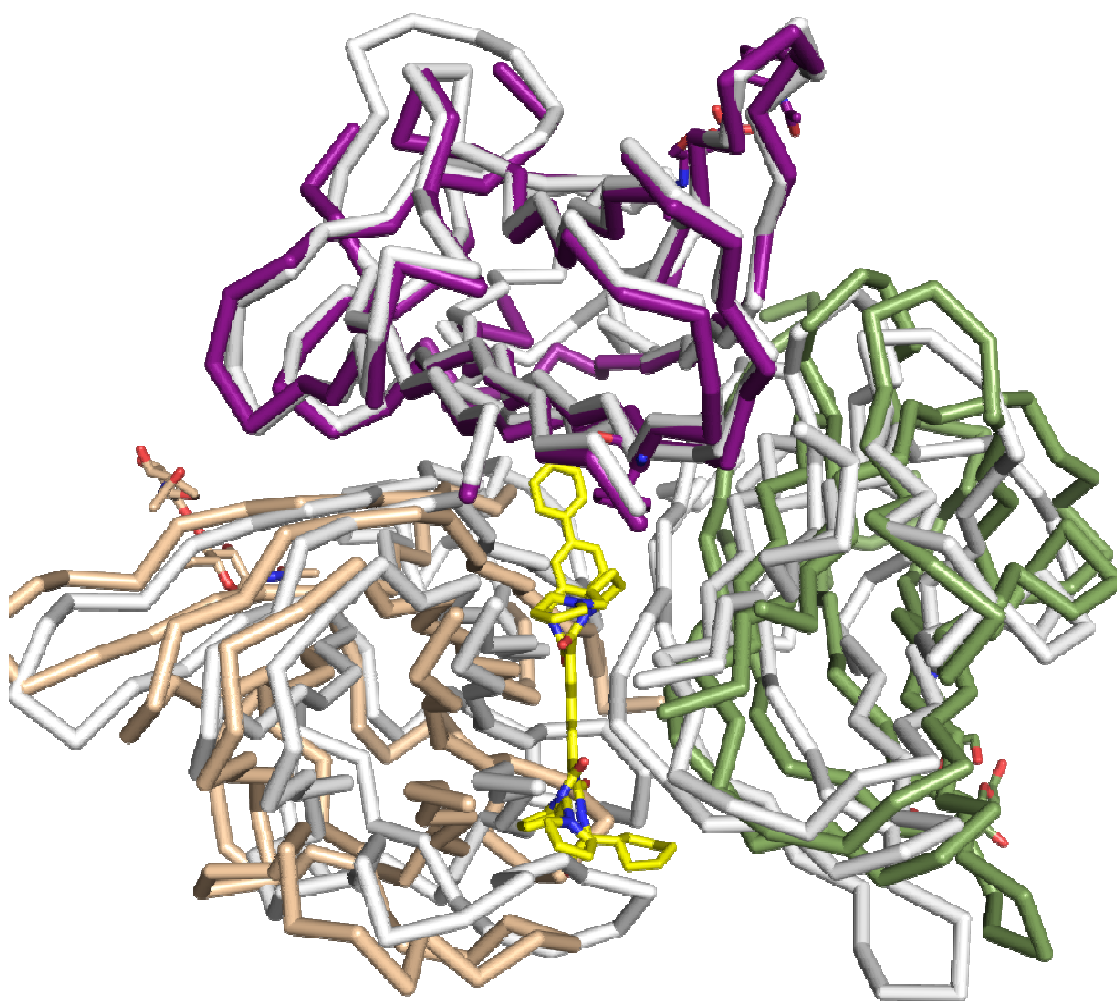

Supplement: Supplementary file 1 [file 4292794]
